# Supplementary material
Source: PubMed Central journal article supplement (PMC8079173)

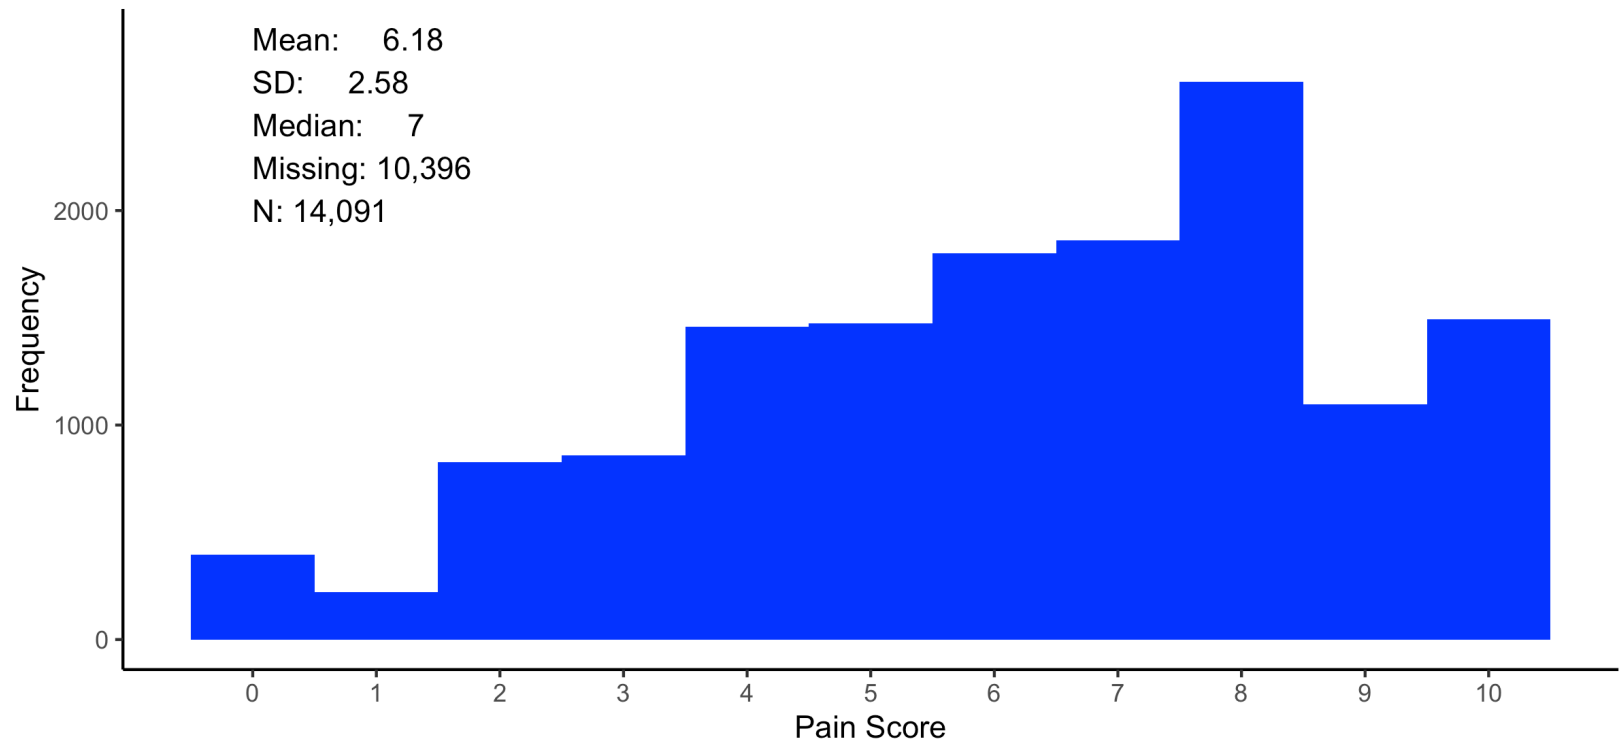

Supplement: NIHMS1620741-supplement-figS1.pdf [file NIHMS1620741-supplement-figS1.pdf]
